# Supplementary material
Source: publisher site journal article supplement (https://www.dovepress.com/article/485841)
Supplement: Supplementary file 1 [file get_supplementary_file.php]

### Supplementary materials

### Stability of Nanocomposites

The stability of nanocomposites were assessed by measurements of zeta potential by electrophoretic light scattering (ELS) over time 0, 8, 12, 24 and 48h using a Zeta Sizer Nano-ZS90 analyzer (Malvern Instruments, Malvern, UK) quadruplicate, at room temperature.


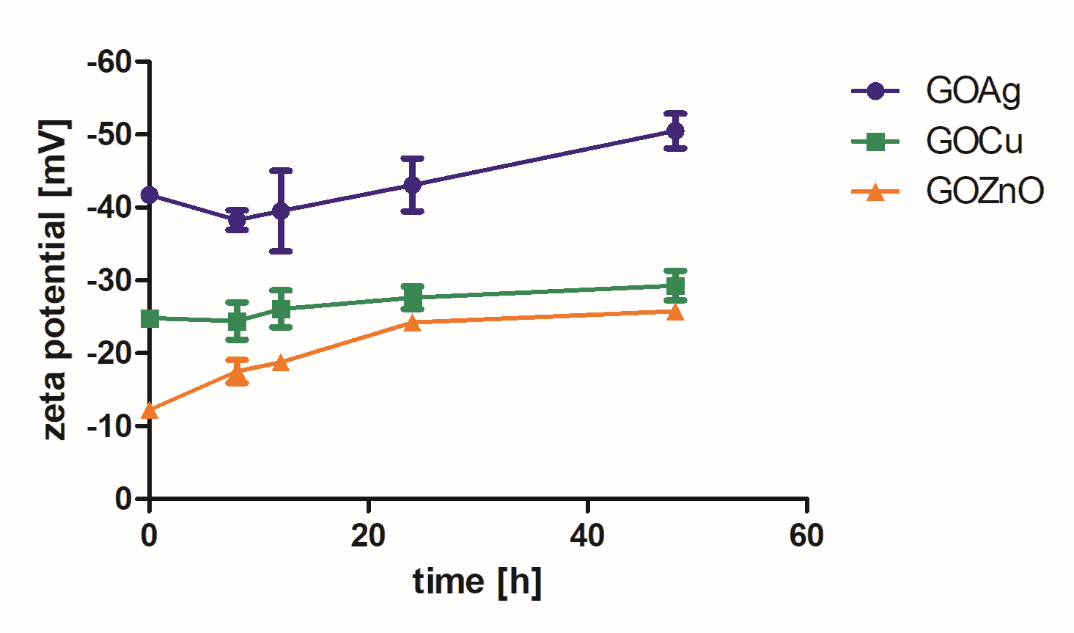


**Figure S1** Zeta potentials of nanocomposites in time. All measurements were performed four times. Zp is the mean value of each sample’s zeta potential.

### Chemical analysis of nanocomposites formed

Chemical analysis of nanocomposites was performed using a Quanta 250 FEG FEI scanning electron microscope with an energy dispersive X-ray (SEM-EDX) detector. Nanocomposites were centrifuged (12 000 rpm, 10 mins) and the supernatant was separated from the pellets. The pellets were suspended in ultrapure water. Then, the droplets (0.05-0.1 μL) of hydrocolloids were placed 10x on the Silicon Wafer (Siegert Wafer, Wafer Specialist) and dried successively in a vacuum-dried Vacucell 55 (MMM Group) at 30°C. The following parameters were used: spot 4.5, 20 kV.

**Table S1** EDX analysis of created nanocomposites: GOAg, GOCu, GOZnO.

| **GOAg** | | | | | |
| --- | --- | --- | --- | --- | --- |
| supernatnat | | | pellet | | |
| Element | Weight % | Atomic % | Element | Weight % | Atomic % |
| C K | 20.97 | 38.12 | C K | 8.62 | 16 |
| O K | 0.93 | 1.27 | O K | 43.8 | 61.05 |
| SiK | 77.89 | 60.56 | SiK | 22.33 | 17.73 |
| AgL | 0.21 | 0.04 | AgL | 25.26 | 5.22 |

| **GOCu** | | | | | |
| --- | --- | --- | --- | --- | --- |
| **supernatnat** | | | **pellet** | | |
| Element | Weight % | Atomic % | Element | Weight % | Atomic % |
| C K | 22.01 | 39.23 | C K | 12.77 | 21.15 |
| O K | 2.73 | 3.65 | O K | 38.02 | 47.29 |
| SiK | 74.68 | 56.92 | SiK | 40.86 | 28.95 |
| CuK | 0.58 | 0.19 | CuK | 8.35 | 2.62 |

| **GOZnO** | | | | | |
| --- | --- | --- | --- | --- | --- |
| supernatnat | | | pellet | | |
| Element | Weight % | Atomic % | Element | Weight % | Atomic % |
| C K | 16.43 | 31.48 | C K | 22.34 | 40.26 |
| O K | 0.83 | 1.19 | O K | 31.53 | 42.65 |
| SiK | 81.75 | 66.98 | SiK | 4.16 | 3.2 |
| ZnK | 0.99 | 0.35 | ZnK | 41.97 | 13.89 |

### Bacterial biofilm formation

Section completely described in the main manuscript.


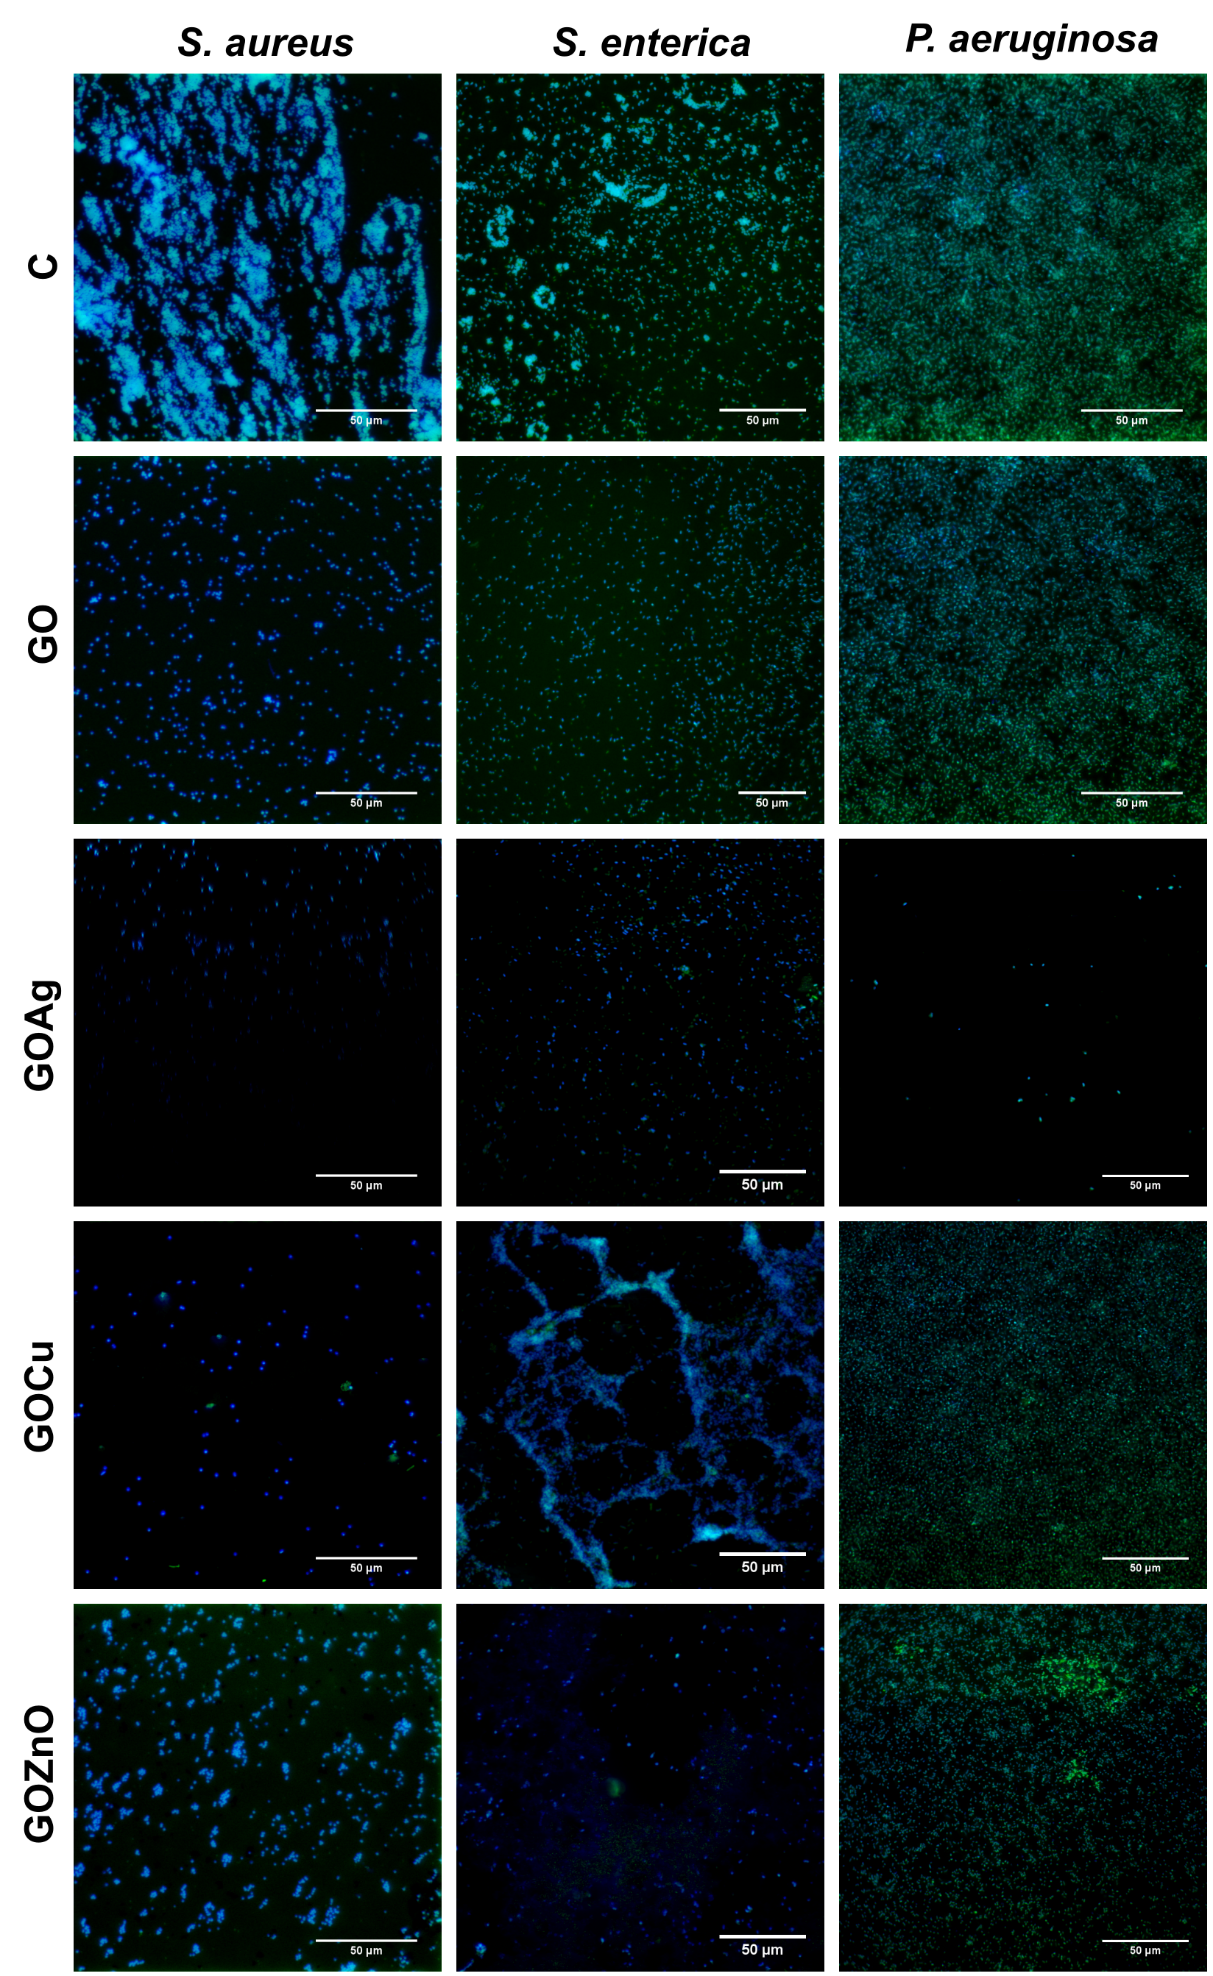


**Figure S2** Z-stack images (confocal microscopy visualization) of biofilm structure of *S. aureus*, *S. enterica*,and *P. aeruginosa* created on the surface of nanofilms.
